# Supplementary material for: Photoelectron photofragment coincidence spectroscopy of carboxylates
Source: Royal Society of Chemistry journal article supplement (doi:10.1039/d1ra06340e), 2021-01-01
Supplement: d1ra06340e1.pdf [file d1ra06340e1.pdf]

# Supplementary information for photoelectron photofragment coincidence spectroscopy of carboxylates

J. A. Gibbard,<sup>a</sup> and R. E. Continetti<sup>a</sup>

<sup>a</sup> Department of Chemistry and Biochemistry, University of California, San Diego,  
9500 Gilman Dr, La Jolla, Ca, 92093-0340. E-mail: rcontinetti@ucsd.edu

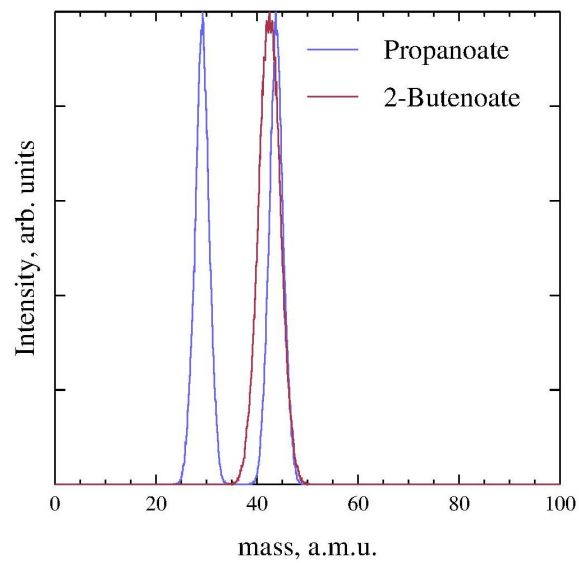

Figure S1: The fragment mass spectrum of propanoate and 2-butenate.

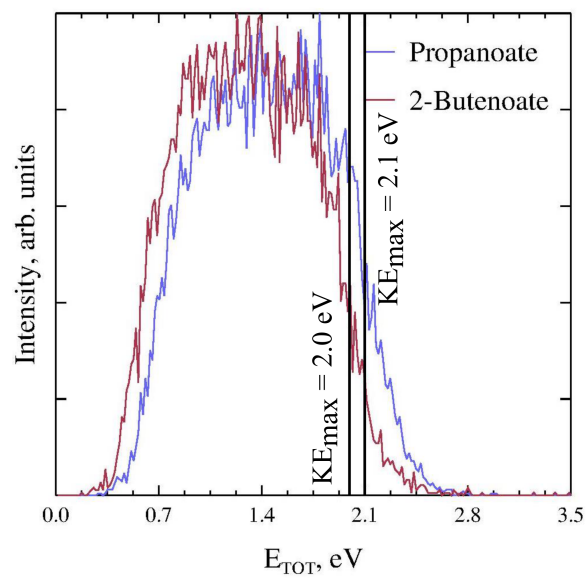

Figure S2: The total energy ( $E_{\text{TOT}}$ ) spectrum of propanoate and 2-butenate.
